# Supplementary material
Source: Springer Nature journal article supplement (https://www.springermedizin.de/resource/supplementary/13014_2006_46_MOESM2_ESM.pdf/9632796)

# 2A

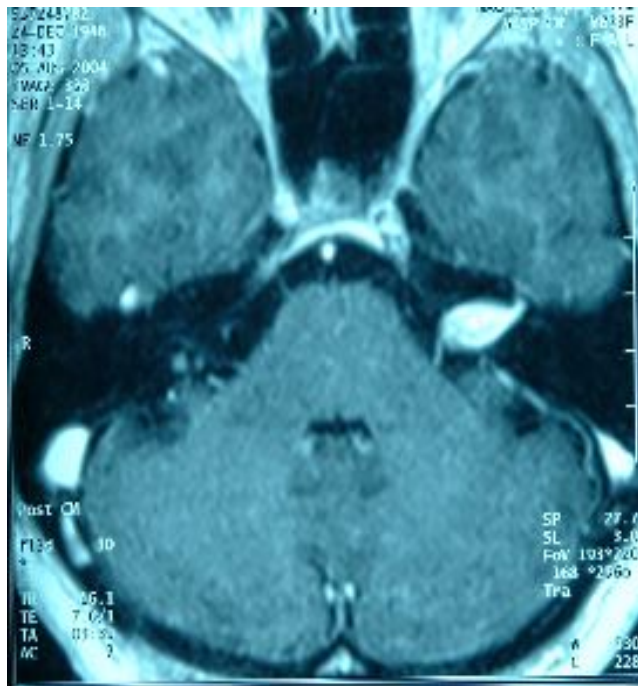

# 2B

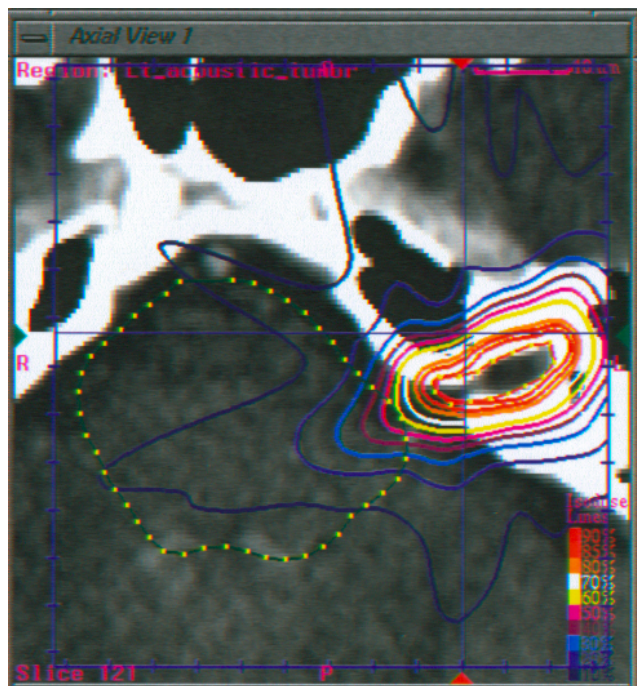

Supplement: MOESM2 [file 9632796]
